# Supplementary material for: Respiratory microbes present in the nasopharynx of children hospitalised with suspected pulmonary tuberculosis in Cape Town, South Africa
Source: Springer Nature journal article supplement (doi:10.1186/s12879-016-1934-z), 2016-10-24
Supplement: MOESM1 [file 10982288]

□

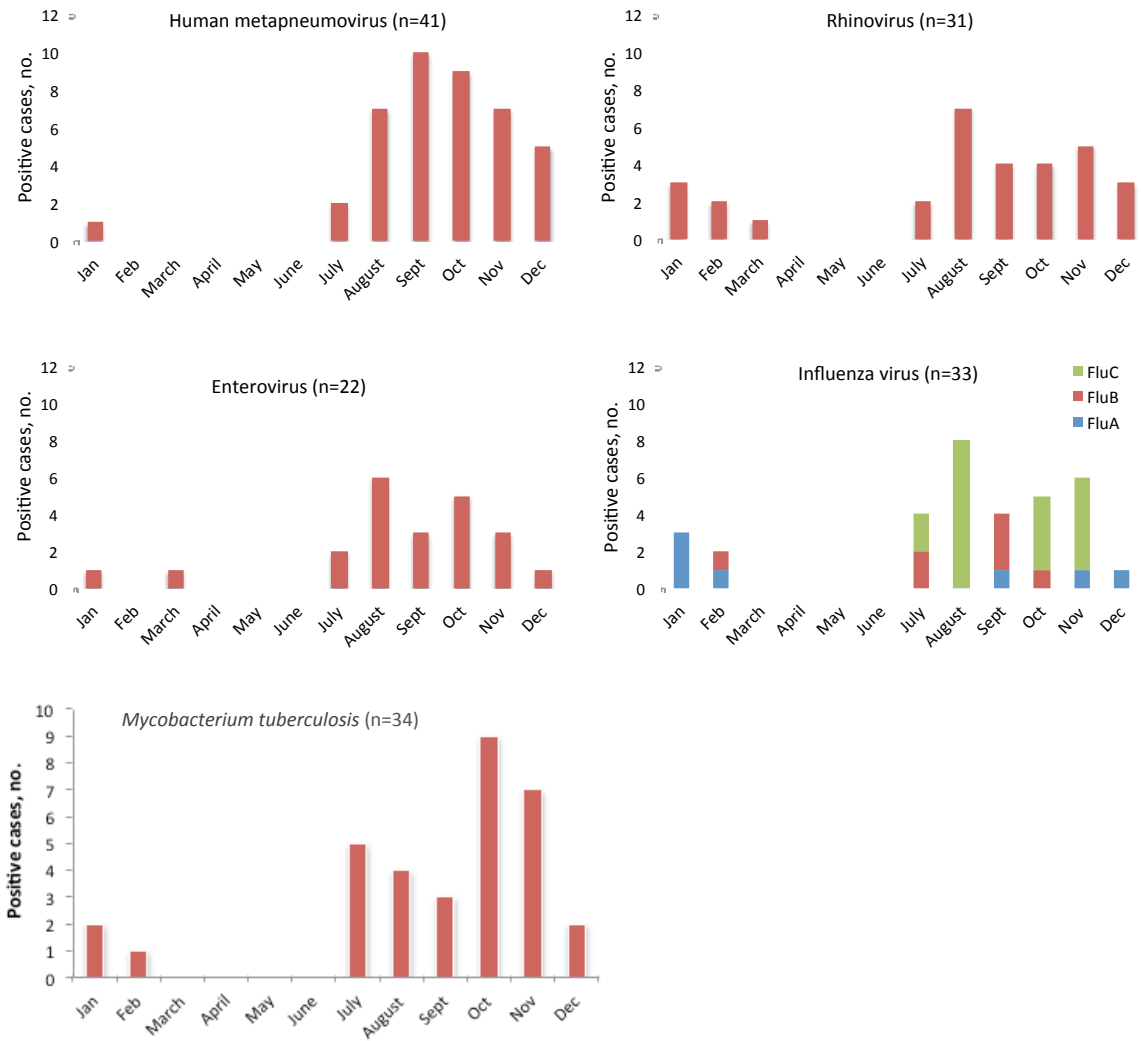

Figure S1: Seasonal distribution of viruses and bacteria.

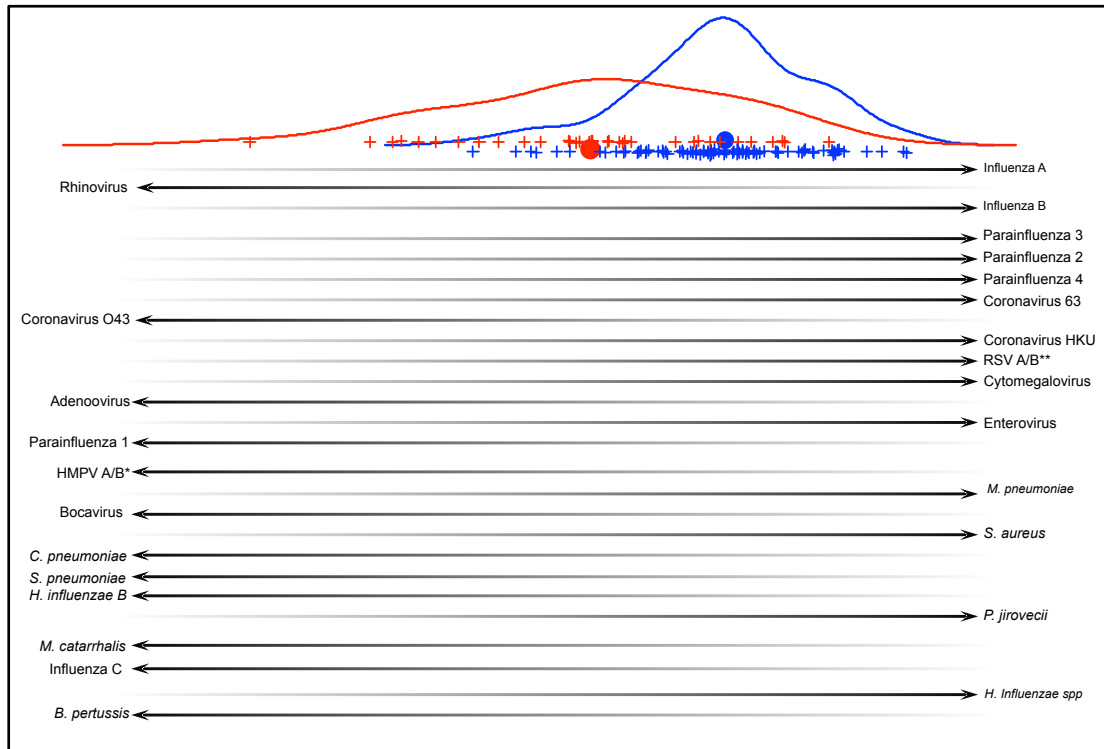

**Supplementary figure 2:** Canonical Variate Analysis (CVA) biplot depicting the spread of respiratory pathogens in the definite TB (red line) and not TB (blue line) groups only. Observations under each group are denoted by “+” signs and the median of each group by the red and blue ovals.

**Table S1:** Target pathogens in the FTD respiratory pathogens 33 multiplex real-time PCR assay.

| <sup>a</sup> Mplx No. | <sup>b</sup> Primer/<br>Probe mix | Target pathogen (Nucleic acid type)     | Target sequence genes                         |
|-----------------------|-----------------------------------|-----------------------------------------|-----------------------------------------------|
| 1                     | FluAB-RH                          | Influenza A (RNA)                       | Matrix gene ( <i>pos1</i> )                   |
|                       |                                   | Influenza B (RNA)                       | Segment 8 NS1/NEP                             |
|                       |                                   | Rhinovirus (RNA)                        | 5'untranslated region (5' UTR)                |
| 2                     | Para-EAV                          | Parainfluenza 3 (RNA)                   | Hemagglutinin-neuraminidase (HN) mRNA         |
|                       |                                   | Parainfluenza 2 (RNA)                   | Hemagglutinin-neuraminidase (HN) mRNA         |
|                       |                                   | Parainfluenza 4 (RNA)                   | Hemagglutinin-neuraminidase (HN) mRNA         |
|                       |                                   | Internal control*                       |                                               |
| 3                     | Cor                               | Coronavirus 229 (RNA)                   | Nucleocapsid protein (N) gene                 |
|                       |                                   | Coronavirus 63 (RNA)                    | Nucleocapsid protein (N) gene                 |
|                       |                                   | Coronavirus HKU1 (RNA)                  | Nucleocapsid protein (N) gene                 |
|                       |                                   | Coronavirus 43 (RNA)                    | Nucleocapsid protein (N) gene                 |
| 4                     | BoMpPfl                           | Parainfluenza 1 (RNA)                   | Hemagglutinin-neuraminidase (HN) mRNA         |
|                       |                                   | Human Metapneumoviruses A/B (RNA)       | Fusion glycoprotein (F) gene                  |
|                       |                                   | Bocavirus (DNA)                         | Nonstructural protein (NP1) gene              |
|                       |                                   | Mycoplasma pneumoniae (DNA)             | Adhesin P1                                    |
| 5                     | RsEPACmv                          | Respiratory syncytial viruses A/B (RNA) | Nucleocapsid protein (N) gene                 |
|                       |                                   | Cytomegalovirus (DNA)                   | US7+US8 genes                                 |
|                       |                                   | Enterovirus (RNA)                       | Parts of domain IV and V                      |
|                       |                                   | Parechovirus (RNA)                      | 5'untranslated region (UTR)                   |
|                       |                                   | Adenovirus (DNA)                        | Hexon gene                                    |
| 6                     | Bac                               | Staphylococcus aureus (DNA)             | Sensor histidine kinase ( <i>vicK</i> ) gene  |
|                       |                                   | Chlamydomphila pneumoniae (DNA)         | RNA polymerase beta chain gene                |
|                       |                                   | Haemophilus influenza B (DNA)           | capsular export ( <i>BexA</i> ) gene          |
|                       |                                   | Streptococcus pneumoniae (DNA)          | LytA gene                                     |
| 7                     | KLePSa                            | Pneumocystis jirovecii (DNA)            | (mtLSU) rRNA gene                             |
|                       |                                   | Legionella spp (DNA)                    | 16 S rRNA                                     |
|                       |                                   | Klebsiella pneumoniae (DNA)             | Hemolysin ( <i>Khe</i> ) gene                 |
|                       |                                   | Salmonella spp (DNA)                    | Tetrathionate subunit B ( <i>ttrB</i> )       |
| 8                     | MoBoCH                            | Moraxella catarrhalis (DNA)             | Outer membrane proteins ( <i>copB</i> ) gene  |
|                       |                                   | Influenza C (RNA)                       | Matrix gene                                   |
|                       |                                   | Bordetella pertussis (DNA)              | Insertion sequence (IS481)                    |
|                       |                                   | Haemophilus influenza spp (DNA)         | Outer membrane proteins ( <i>ompP2</i> ) gene |

*Note.* \*Equine arteritis virus (EAV) based Internal control. <sup>a</sup>Mplx No.= Multiplex PCR reaction number as indicated in the FTD resp33 kit. <sup>b</sup>Pathogen names as indicated on package inserts for each multiplex reaction mix.

**Table S2:** Summary of all paired pathogen co-occurrence counts \*

|                          | Influenza A | Rhinovirus | Influenza B | Parainfluenza 3 | Parainfluenza 2 | Parainfluenza 4 | Coronavirus 29 | Coronavirus 63 | Coronavirus 43 | Coronavirus HK | RSV A/B <sup>a</sup> | Cytomegalovirus | Adenovirus | Enterovirus | Parainfluenza 1 | HmPV A/B <sup>b</sup> | <i>M. pneumoniae</i> | Bocavirus | <i>S. aureus</i> | <i>C. pneumoniae</i> | <i>S. pneumoniae</i> | <i>H. influenzae B</i> | <i>P. jirovecii</i> | <i>M. cartarrhalis</i> | Influenza C | <i>H. influenzae sp</i> | <i>B. pertussis</i> |  |
|--------------------------|-------------|------------|-------------|-----------------|-----------------|-----------------|----------------|----------------|----------------|----------------|----------------------|-----------------|------------|-------------|-----------------|-----------------------|----------------------|-----------|------------------|----------------------|----------------------|------------------------|---------------------|------------------------|-------------|-------------------------|---------------------|--|
| Influenza B              | <b>7</b>    |            |             |                 |                 |                 |                |                |                |                |                      |                 |            |             |                 |                       |                      |           |                  |                      |                      |                        |                     |                        |             |                         |                     |  |
| Rhinovirus               | 0           | <b>31</b>  |             |                 |                 |                 |                |                |                |                |                      |                 |            |             |                 |                       |                      |           |                  |                      |                      |                        |                     |                        |             |                         |                     |  |
| Influenza B              | 0           | 0          | <b>7</b>    |                 |                 |                 |                |                |                |                |                      |                 |            |             |                 |                       |                      |           |                  |                      |                      |                        |                     |                        |             |                         |                     |  |
| Parainfluenza 3          | 0           | 1          | 0           | <b>2</b>        |                 |                 |                |                |                |                |                      |                 |            |             |                 |                       |                      |           |                  |                      |                      |                        |                     |                        |             |                         |                     |  |
| Parainfluenza 2          | 0           | 1          | 0           | 0               | <b>1</b>        |                 |                |                |                |                |                      |                 |            |             |                 |                       |                      |           |                  |                      |                      |                        |                     |                        |             |                         |                     |  |
| Parainfluenza 4          | 0           | 1          | 0           | 0               | 0               | <b>2</b>        |                |                |                |                |                      |                 |            |             |                 |                       |                      |           |                  |                      |                      |                        |                     |                        |             |                         |                     |  |
| Coronavirus 229          | 0           | 0          | 0           | 0               | 0               | 0               | <b>1</b>       |                |                |                |                      |                 |            |             |                 |                       |                      |           |                  |                      |                      |                        |                     |                        |             |                         |                     |  |
| Coronavirus 63           | 0           | 0          | 0           | 0               | 0               | 0               | 0              | <b>2</b>       |                |                |                      |                 |            |             |                 |                       |                      |           |                  |                      |                      |                        |                     |                        |             |                         |                     |  |
| Coronavirus 43           | 0           | 2          | 1           | 0               | 0               | 0               | 0              | 0              | <b>12</b>      |                |                      |                 |            |             |                 |                       |                      |           |                  |                      |                      |                        |                     |                        |             |                         |                     |  |
| Coronavirus              | 1           | 0          | 0           | 0               | 0               | 0               | 0              | 0              | 0              | <b>2</b>       |                      |                 |            |             |                 |                       |                      |           |                  |                      |                      |                        |                     |                        |             |                         |                     |  |
| RSV A/B <sup>a</sup>     | 0           | 1          | 0           | 0               | 0               | 0               | 0              | 0              | 0              | 0              | <b>7</b>             |                 |            |             |                 |                       |                      |           |                  |                      |                      |                        |                     |                        |             |                         |                     |  |
| Cytomegalovirus          | 2           | 0          | 0           | 0               | 0               | 0               | 1              | 0              | 1              | 1              | 0                    | <b>14</b>       |            |             |                 |                       |                      |           |                  |                      |                      |                        |                     |                        |             |                         |                     |  |
| Adenovirus               | 1           | 1          | 0           | 0               | 0               | 0               | 0              | 0              | 1              | 1              | 0                    | 2               | <b>14</b>  |             |                 |                       |                      |           |                  |                      |                      |                        |                     |                        |             |                         |                     |  |
| Enterovirus              | 0           | 6          | 1           | 0               | 0               | 1               | 0              | 0              | 0              | 0              | 0                    | 1               | 3          | <b>22</b>   |                 |                       |                      |           |                  |                      |                      |                        |                     |                        |             |                         |                     |  |
| Parainfluenza 1          | 0           | 0          | 0           | 0               | 0               | 0               | 0              | 1              | 1              | 0              | 0                    | 0               | 0          | 0           | <b>5</b>        |                       |                      |           |                  |                      |                      |                        |                     |                        |             |                         |                     |  |
| HmPV A/B <sup>b</sup>    | 1           | 6          | 1           | 1               | 0               | 0               | 0              | 0              | 3              | 0              | 0                    | 4               | 2          | 9           | 0               | <b>41</b>             |                      |           |                  |                      |                      |                        |                     |                        |             |                         |                     |  |
| <i>M. pneumoniae</i>     | 1           | 4          | 0           | 2               | 0               | 1               | 0              | 0              | 1              | 0              | 2                    | 0               | 2          | 3           | 0               | 4                     | <b>19</b>            |           |                  |                      |                      |                        |                     |                        |             |                         |                     |  |
| Bocavirus                | 2           | 2          | 0           | 0               | 0               | 0               | 0              | 0              | 0              | 1              | 1                    | 0               | 1          | 1           | 0               | 1                     | 0                    | <b>8</b>  |                  |                      |                      |                        |                     |                        |             |                         |                     |  |
| <i>S. aureus</i>         | 0           | 6          | 1           | 0               | 0               | 1               | 0              | 0              | 2              | 0              | 1                    | 4               | 1          | 8           | 0               | 11                    | 3                    | 3         | <b>47</b>        |                      |                      |                        |                     |                        |             |                         |                     |  |
| <i>C. pneumoniae</i>     | 0           | 1          | 0           | 0               | 0               | 0               | 0              | 0              | 0              | 0              | 1                    | 1               | 1          | 1           | 1               | 0                     | 1                    | 1         | 1                | <b>9</b>             |                      |                        |                     |                        |             |                         |                     |  |
| <i>S. pneumoniae</i>     | 5           | 17         | 3           | 0               | 0               | 1               | 0              | 0              | 7              | 1              | 1                    | 8               | 5          | 9           | 1               | 23                    | 7                    | 3         | 22               | 1                    | <b>90</b>            |                        |                     |                        |             |                         |                     |  |
| <i>H. influenzae B</i>   | 0           | 4          | 0           | 0               | 0               | 1               | 0              | 0              | 1              | 0              | 0                    | 2               | 4          | 7           | 0               | 5                     | 6                    | 0         | 8                | 1                    | 14                   | <b>31</b>              |                     |                        |             |                         |                     |  |
| <i>P. jirovecii</i>      | 1           | 4          | 1           | 0               | 0               | 0               | 0              | 1              | 2              | 2              | 1                    | 2               | 1          | 2           | 0               | 4                     | 2                    | 1         | <b>13</b>        | 0                    | 9                    | 9                      | <b>23</b>           |                        |             |                         |                     |  |
| <i>M. cartarrhalis</i>   | 5           | 24         | 6           | 2               | 0               | 1               | 0              | 2              | 11             | 1              | 5                    | 10              | 6          | 18          | 2               | 31                    | 17                   | 2         | 28               | 4                    | 75                   | 19                     | 14                  | <b>137</b>             |             |                         |                     |  |
| Adenovirus               | 0           | 2          | 0           | 0               | 0               | 0               | 0              | 0              | 2              | 0              | 2                    | 0               | 1          | 2           | 2               | 2                     | 5                    | 1         | 0                | 2                    | 3                    | 8                      | 2                   | 13                     | <b>19</b>   |                         |                     |  |
| <i>H. influenzae spp</i> | 5           | 9          | 3           | 1               | 0               | 0               | 0              | 0              | 4              | 1              | 1                    | 9               | 5          | 4           | 1               | 18                    | 5                    | 2         | 8                | 3                    | 35                   | 7                      | 6                   | 46                     | 0           | <b>62</b>               |                     |  |
| <i>B. pertussis</i>      | 0           | 2          | 1           | 0               | 0               | 0               | 0              | 0              | 1              | 0              | 0                    | 0               | 0          | 3           | 0               | 1                     | 2                    | 0         | 0                | 1                    | 3                    | 7                      | 0                   | 10                     | 7           | 4                       | <b>12</b>           |  |

\*The pathogen abbreviation names in the top row are derived from the first column. The diagonal line represents the total count of each pathogen detected. <sup>a</sup>RSV A/B = Respiratory Syncytial virus A and B, <sup>b</sup>HmPV A/B = Human Metapneumovirus A and B

**Table S3: Risk factors associated with the occurrence of each microbes.**

|                          | Age | Gender | Smoking | Night sweats | Fever | Malaise | Cough | Appetite loss | Weight loss | Vomiting | BMI  | Hypoxia | Chest in-drawing | Respiratory rate | HIV infection |
|--------------------------|-----|--------|---------|--------------|-------|---------|-------|---------------|-------------|----------|------|---------|------------------|------------------|---------------|
| <b>Bacteria</b>          |     |        |         |              |       |         |       |               |             |          |      |         |                  |                  |               |
| <i>M. catarrhalis</i>    | 1   | 1      | 1       | 1            | 1     | 1       | 1     | 1             | 1           | 1        | 1    | 1       | 1                | 1                | 1             |
| <i>S. pneumoniae</i>     | 1   | 1      | 1       | 1            | 1     | 1       | 1     | 1             | 1           | 1        | 1    | 1       | 1                | 1                | 1             |
| <i>H. influenzae spp</i> | 1   | 1      | 1       | 1            | 1     | 1       | 1     | 1             | 1           | 1        | 1    | 1       | 1                | 1                | 1             |
| <i>S. aureus</i>         | 1   | 1      | 1       | 1            | 1     | 1       | 1     | 1             | 1           | 1        | 1    | 1       | 1                | 1                | 1             |
| <i>H. influenzae B</i>   | 1   | 1      | 1       | 1            | 1     | 1       | 1     | 1             | 1           | 1        | 1    | 1       | 1                | 1                | 1             |
| <i>M. pneumoniae</i>     | 1   | 1      | 1       | 1            | 1     | 1       | 1     | 1             | 1           | 1        | 1    | 1       | 1                | 1                | 1             |
| <i>B. pertussis</i>      | 1   | 1      | 1       | 1            | 1     | 1       | 1     | 1             | 1           | 1        | 1    | 1       | 1                | 1                | 1             |
| <i>C. pneumoniae</i>     | 1   | 1      | 1       | 1            | 1     | 1       | 1     | 1             | 1           | 1        | 1    | 1       | 1                | 1                | 1             |
| <b>Viruses</b>           |     |        |         |              |       |         |       |               |             |          |      |         |                  |                  |               |
| Metapneumovirus A/B      | 1   | 1      | 1       | 1            | 1     | 1       | 1     | 1             | 1           | 1        | 1    | 1       | 1                | 1                | 1             |
| Rhinovirus               | 1   | 1      | 1       | 1            | 1     | 1       | 1     | 1             | 1           | 1        | 1    | 1       | 1                | 1                | 1             |
| Enterovirus              | 1   | 1      | 1       | 1            | 1     | 1       | 1     | 1             | 1           | 1        | 1    | 1       | 1                | 1                | 1             |
| Adenovirus               | 1   | 1      | 1       | 1            | 1     | 1       | 1     | 1             | 1           | 1        | 1    | 1       | 1                | 1                | 1             |
| Cytomegalovirus          | 1   | 1      | 1       | 1            | 1     | 1       | 1     | 1             | 1           | 1        | 1    | 1       | 1                | 1                | 1             |
| Bocavirus                | 1   | 1      | 1       | 1            | 1     | 1       | 1     | 1             | 1           | 1        | 1    | 1       | 1                | 1                | 1             |
| Coronavirus              | 1   | 1      | 1       | 1            | 1     | 1       | 1     | 1             | 1           | 1        | 1    | 1       | 1                | 1                | 1             |
| Coronavirus O43          | 1   | 1      | 1       | 1            | 1     | 1       | 1     | 1             | 1           | 1        | 1    | 1       | 1                | 1                | 1             |
| Coronavirus HKU          | 1   | 1      | 1       | 1            | 1     | 1       | 1     | 1             | 1           | 1        | 1    | 1       | 1                | 1                | 1             |
| Coronavirus NL63         | 1   | 1      | 1       | 1            | 1     | 1       | 1     | 1             | 0.46        | 1        | 1    | 1       | 1                | 1                | 1             |
| Coronavirus 229E         | 1   | 1      | 1       | 1            | 1     | 1       | 1     | 1             | 1           | 1        | 1    | 1       | 1                | 1                | 1             |
| RSV A/B*                 | 1   | 1      | 1       | 1            | 1     | 1       | 1     | 1             | 1           | 1        | 1    | 1       | 1                | 1                | 1             |
| Influenza virus          | 1   | 1      | 1       | 1            | 1     | 1       | 1     | 1             | 1           | 1        | 1    | 1       | 1                | 1                | 1             |
| Influenza A              | 1   | 1      | 1       | 1            | 1     | 1       | 1     | 1             | 1           | 1        | 0.09 | 1       | 1                | 1                | 1             |
| Influenza B              | 1   | 1      | 1       | 1            | 1     | 1       | 1     | 1             | 1           | 1        | 1    | 1       | 1                | 1                | 1             |
| Influenza C              | 1   | 1      | 1       | 1            | 1     | 1       | 1     | 1             | 1           | 1        | 1    | 1       | 1                | 1                | 1             |
| Parainfluenza virus      | 1   | 1      | 1       | 1            | 1     | 1       | 1     | 1             | 1           | 1        | 1    | 1       | 1                | 1                | 1             |
| Parainfluenza 1          | 1   | 1      | 1       | 1            | 1     | 1       | 1     | 1             | 1           | 1        | 1    | 1       | 1                | 1                | 1             |
| Parainfluenza 2          | 1   | 1      | 1       | 1            | 1     | 1       | 1     | 1             | 1           | 1        | 1    | 1       | 1                | 1                | 1             |
| Parainfluenza 3          | 1   | 1      | 1       | 1            | 1     | 1       | 1     | 1             | 1           | 1        | 1    | 1       | 1                | 1                | 1             |
| Parainfluenza 4          | 1   | 1      | 1       | 1            | 1     | 1       | 1     | 1             | 1           | 1        | 1    | 0.48    | 1                | 1                | 1             |
| <b>Fungi</b>             |     |        |         |              |       |         |       |               |             |          |      |         |                  |                  |               |
| <i>P. jirovecii</i>      | 1   | 1      | 1       | 1            | 1     | 1       | 1     | 1             | 1           | 1        | 1    | 1       | 1                | 1                | 1             |

Logistic regression performed of all risk factors on each pathogen. p-values corrected for simultaneous testing with Benjamini Hochberg. No statistically significant effects found at 5% level.
